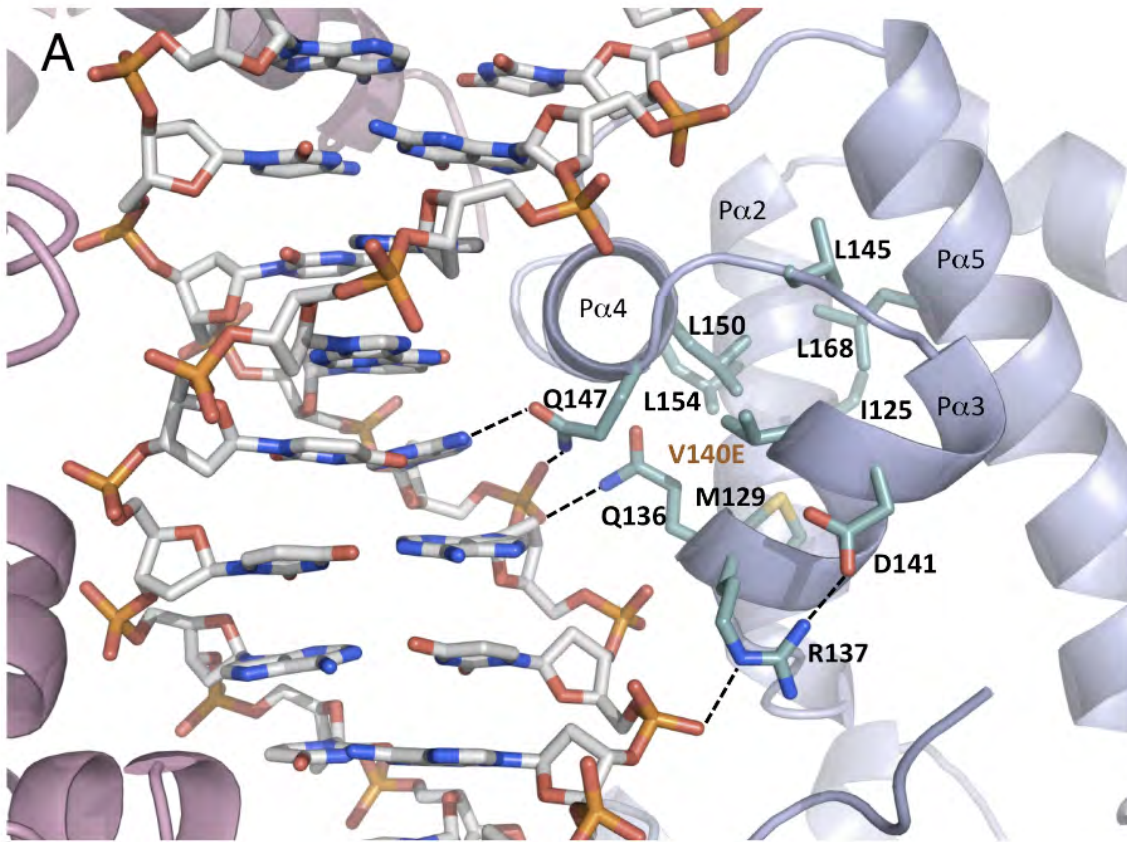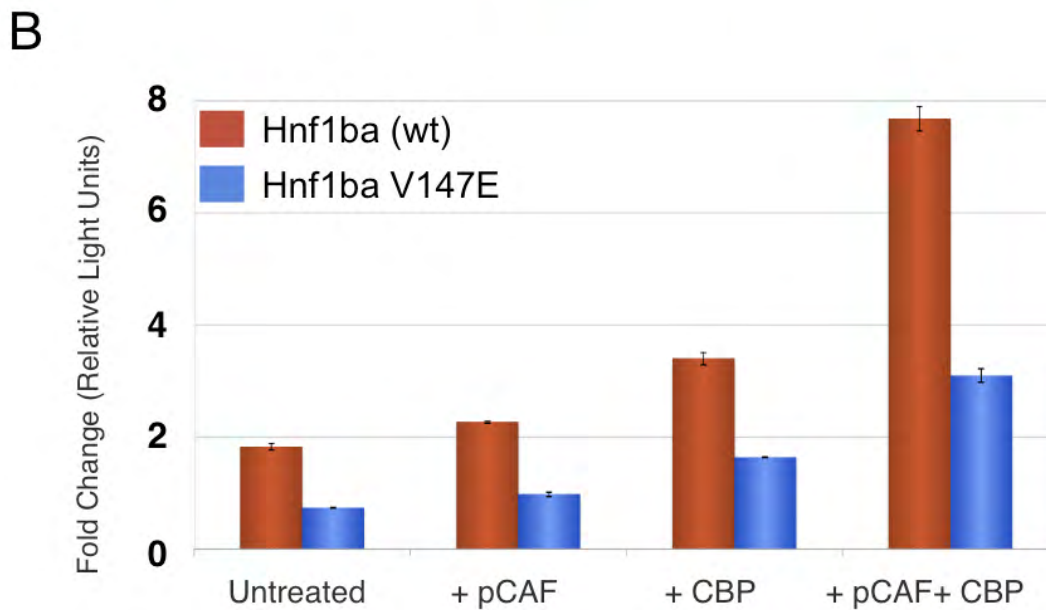

**Fig. S1. The *hnf1ba*<sup>s430</sup> mutation attenuates protein function.** (A) A detailed structural view of V140 and the surrounding residues of human HNF1B (PDB access code 2H8R). The functional/structural key residues and the target sequence-containing DNA are shown as a ball and stick model. Broken lines indicate hydrogen bonds or ionic interactions. HNF1B is made of two DNA-binding domains, POU-homeo and POU-specific with V140 found in the POU-specific domain. Substitution of a highly charged group at this analogous position, as occurs in the zebrafish *hnf1ba*<sup>s430/-</sup> mutant (V147E), is predicted to perturb the hydrophobic core leading to structural and functional defects. (B) Summary of luciferase transactivation assay using Min6 cells transfected with a multimerized HNF1 reporter B28-Luc (300 ng) in the presence of pcDNA3-Myc-Hnf1ba (wild type) or V147E Hnf1ba (75 ng), along with control or vectors coding pCMV-PCAF or RSV-CBP (50 ng each), as indicated. Each column represents induced fold-activation of the reporter by wild-type Hnf1ba (red) or V147E Hnf1ba (blue) relative to activity measured under identical conditions using pcDNA3 control. V147E Hnf1ba protein less efficiently activates transcription compared with wild-type Hnf1ba ( $P < 0.001$ ), but can still be partially enhanced by co-activators pCAF and CBP, suggesting that the V147E Hnf1ba protein function is reduced but not lost.

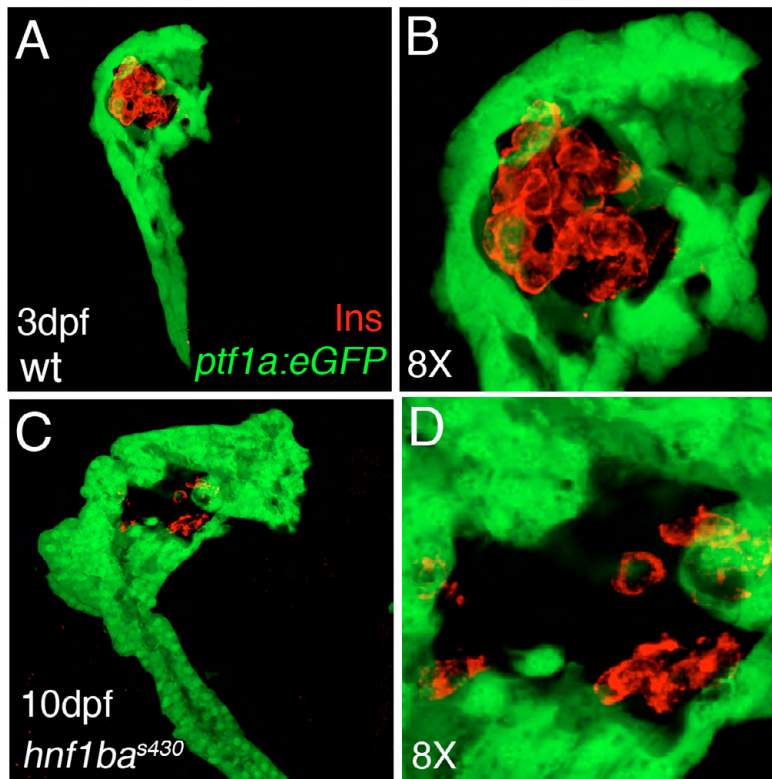

**Fig. S2. Severe example of  $\beta$ -cell number reduction and disorganization in a *hnf1ba*<sup>s430</sup> mutant with mild exocrine hypoplasia.** (A-D) Fluorescent confocal microscopy of *Tg(ptf1a:eGFP)<sup>h1</sup>* (green) 3 dpf wild-type (A,B) and 10 dpf *hnf1b*<sup>s430</sup> mutant (C,D) pancreas stained for insulin to mark  $\beta$ -cells (red). 3D rendering showing an *hnf1ba*<sup>s430</sup> mutant at 10 dpf with a larger exocrine pancreas (C) than that of a wild type at 3 dpf (A). (B,D) Magnification (8 $\times$ ) of A and C showing that  $\beta$ -cells (red) remain both reduced and disorganized in *hnf1ba*<sup>s430</sup> mutants at 10 dpf.

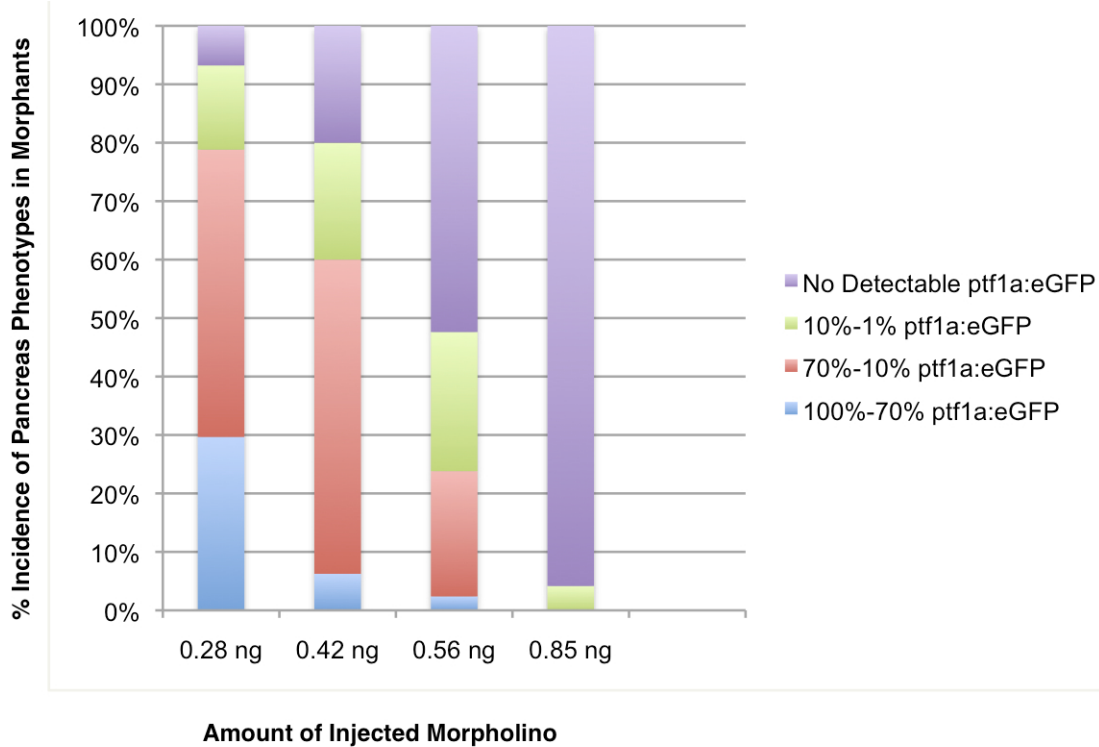

**Fig. S3. Dose-dependent severity of pancreas hypoplasia resulting from *hnf1ba* knock-down via morpholino.** Distribution of pancreas hypoplasia severity caused by antisense morpholino knock-down of *Hnf1ba* translation, as assessed by pancreatic *ptf1a*:eGFP expression. Injected embryos were scored at 80 hpf based on size of *ptf1a*:eGFP-positive foregut tissue relative to uninjected clutchmates. Higher doses of *Hnf1ba* morpholino produce a higher incidence of more severe pancreas hypoplasia and agenesis defects (n>48 for each dosage).

**Table S1. Quantification of hepatopancreas phenotypes in *wnt2bb*<sup>s404</sup> and *hnf1ba*<sup>s430</sup> mutants**

| Genotype                                                         | % with no hepatocytes |              | % with no exocrine cells | % with no hepatocytes or exocrine cells | % with no hepatocytes, exocrine cells, or extra hp ducts |
|------------------------------------------------------------------|-----------------------|--------------|--------------------------|-----------------------------------------|----------------------------------------------------------|
|                                                                  | 80 hpf                | 120 hpf      | 120 hpf                  | 80 hpf                                  | 80 hpf                                                   |
| <i>wnt2bb</i> <sup>s404</sup>                                    | 11<br>(46/422)        | 0<br>(n>200) | 0<br>(>200)              | 0 (>200)                                | 0 (>200)                                                 |
| <i>hnf1ba</i> <sup>s430</sup>                                    | 0<br>(n>200)          | 0<br>(n>200) | 8.4<br>(34/406)          | 0 (>200)                                | 0 (>200)                                                 |
| <i>wnt2bb</i> <sup>s404</sup> ;<br><i>hnf1ba</i> <sup>s430</sup> | 80<br>(44/55)         | 54<br>49/91  | 34<br>(31/91)            | 24 (22/91)                              | 6 (3/48)                                                 |

The incidence of hepatopancreas agenesis phenotypes in *wnt2bb*<sup>s404</sup>, *hnf1ba*<sup>s430</sup> and *wnt2bb*<sup>s404</sup>; *hnf1ba*<sup>s430</sup> double mutants at 80 and 120 hours post fertilization (hpf). Presence of hepatocytes based on *lfabp:dsRed* expression; presence of exocrine cells based on *pf1a:eGFP* expression; presence of duct cells based on 2F11 labeling.
